# Supplementary material for: New Approach Methods for Hazard Identification: A Case Study with Azole Fungicides Affecting Molecular Targets Associated with the Adverse Outcome Pathway for Cholestasis
Source: MDPI journal article supplement (doi:10.3390/cells11203293), 2022-10-19
Supplement: s1 [file s1]

### Supplementary table S1: gene expression as measured by RT-PCR

Supplementary table 1: Changes in gene expression after treatment for 24h and 6 days with propiconazole (Pi) and tebuconazole (Te) in HepaRG cells. Fold changes, standard deviations and substance concentrations are given. Abbreviation: n.s., not significant.

| gene            | 24 hours           |                    |                    | 6 days             |                    |                    |
|-----------------|--------------------|--------------------|--------------------|--------------------|--------------------|--------------------|
|                 | Pi                 | Te                 | Pi + Te            | Pi                 | Te                 | Pi + Te            |
| <i>hABCB11</i>  | 0.47 ± 0.49 (40µM) | n.s.               | 0.08 ± 0.01 (40µM) | 0.69 ± 0.08 (20µM) | n.s.               | 0.82 ± 0.08 (20µM) |
| <i>hABCC3</i>   | 0.82 ± 0.02 (40µM) | 0.63 ± 0.28 (40µM) | 0.84 ± 0.10 (40µM) | n.s.               | n.s.               | n.s.               |
| <i>hABCG5</i>   | 0.18 ± 0.11 (40µM) | 0.33 ± 0.23 (40µM) | 0.10 ± 0.04 (40µM) | 0.51 ± 0.26 (20µM) | n.s.               | 0.46 ± 0.05 (20µM) |
| <i>hCYP7A1</i>  | 0.09 ± 0.12 (40µM) | 0.31 ± 0.01 (40µM) | 0.23 ± 0.32 (20µM) | 0.38 ± 0.02 (20µM) | 0.88 ± 0.60 (20µM) | 0.59 ± 0.16 (20µM) |
| <i>hCYP8B1</i>  | 0.11 ± 0.13 (40µM) | 0.37 ± 0.21 (40µM) | 0.28 ± 0.36 (20µM) | 0.46 ± 0.12 (20µM) | n.s.               | n.s.               |
| <i>hACAT2</i>   | 1.96 ± 0.21 (20µM) | 2.23 ± 0.26 (20µM) | 2.15 ± 0.32 (10µM) | 2.05 ± 0.34 (20µM) | 2.16 ± 0.77 (10µM) | 2.04 ± 0.53 (10µM) |
| <i>hHMGCR</i>   | 1.68 ± 0.07 (20µM) | 2.05 ± 0.25 (20µM) | 1.94 ± 0.42 (10µM) | 3.06 ± 0.89 (20µM) | 2.04 ± 0.51 (10µM) | 1.94 ± 0.16 (5µM)  |
| <i>hHMGCS1</i>  | 2.04 ± 0.26 (20µM) | 2.56 ± 0.63 (20µM) | 2.32 ± 0.34 (10µM) | 3.30 ± 0.25 (10µM) | 2.88 ± 0.69 (10µM) | 2.43 ± 0.32 (5µM)  |
| <i>hLSS</i>     | 1.97 ± 0.09 (20µM) | 2.33 ± 0.46 (20µM) | 2.10 ± 0.40 (10µM) | 3.15 ± 0.98 (20µM) | 5.26 ± 1.26 (10µM) | 5.88 ± 0.22 (20µM) |
| <i>hOSTα</i>    | 0.36 ± 0.44 (40µM) | 0.56 ± 0.13 (40µM) | n.s.               | 0.28 ± 0.12 (20µM) | n.s.               | 0.42 ± 0.09 (20µM) |
| <i>hOSTβ</i>    | n.s.               | n.s.               | n.s.               | 2.50 ± 0.92 (20µM) | n.s.               | n.s.               |
| <i>hSC4mol</i>  | 1.60 ± 0.17 (20µM) | 1.81 ± 0.11 (20µM) | 1.65 ± 0.23 (10µM) | 3.03 ± 0.92 (20µM) | 1.51 ± 0.29 (10µM) | 1.55 ± 0.21 (20µM) |
| <i>hSLC10A1</i> | 0.08 ± 0.10 (40µM) | 0.34 ± 0.28 (40µM) | 0.34 ± 0.47 (20µM) | 0.37 ± 0.11 (20µM) | n.s.               | n.s.               |
| <i>hSLCO1B1</i> | 0.63 ± 0.24 (40µM) | n.s.               | n.s.               | n.s.               | n.s.               | n.s.               |

### Supplementary table S2: Proteindata

Supplementary table 2: Changes in protein amount after treatment for 24h with propiconazole (Pi) and tebuconazole (Te) in HepaRG cells. Fold changes and standard deviations are given.

|         | protein amount |             |                 |
|---------|----------------|-------------|-----------------|
|         | Pi [40 µM]     | Te [40 µM]  | Pi + Te [40 µM] |
| ABCC3   | 0.48 ± 0.02    | 0.42 ± 0.01 | 0.47 ± 0.06     |
| CYP8B1  | 0.35 ± 0.07    | 0.27 ± 0.01 | 0.29 ± 0.03     |
| SLC10A1 | 0.50 ± 0.19    | 0.39 ± 0.17 | 0.51 ± 0.19     |

**Supplementary table S3: DLR data based on Knebel et al. 2019**

Supplementary table 3: Propiconazole and tebuconazole interact with different nuclear receptors in HepG2 cells. Here data on CAR and PXR are presented. Substance, concentrations, fold changes  $\geq 2$  or  $\leq 0.75$  and significance ( $p < 0.05$ , Mann-Whitney rank sum test, n.s.), and are given. Abbreviation: n.s., not significant.

| Reporter | Substance | Concentration | Response | Significance |
|----------|-----------|---------------|----------|--------------|
| CAR      | Pi        | 5 $\mu$ M     | 2,76     | n.s.         |
|          | Pi        | 10 $\mu$ M    | 4,51     | n.s.         |
|          | Pi        | 20 $\mu$ M    | 6,62     | $p < 0.05$   |
|          | Pi        | 40 $\mu$ M    | 6,76     | $p < 0.05$   |
|          | Te        | 5 $\mu$ M     | 0,97     | n.s.         |
|          | Te        | 10 $\mu$ M    | 0,95     | n.s.         |
|          | Te        | 20 $\mu$ M    | 0,73     | n.s.         |
|          | Te        | 40 $\mu$ M    | 0,70     | n.s.         |
| PXR      | Pi        | 5 $\mu$ M     | 2,79     | n.s.         |
|          | Pi        | 10 $\mu$ M    | 5,31     | $p < 0.05$   |
|          | Pi        | 20 $\mu$ M    | 8,77     | $p < 0.05$   |
|          | Pi        | 40 $\mu$ M    | 9,33     | $p < 0.05$   |
|          | Te        | 5 $\mu$ M     | 3,12     | n.s.         |
|          | Te        | 10 $\mu$ M    | 5,40     | $p < 0.05$   |
|          | Te        | 20 $\mu$ M    | 6,23     | $p < 0.05$   |
|          | Te        | 40 $\mu$ M    | 7,00     | $p < 0.05$   |

**Supplementary table S4: Sequences of primers used for RT-PCR analysis**

| gene                           | forward primer (5'-3')  | reverse primer (5'-3')  |
|--------------------------------|-------------------------|-------------------------|
| <i>hABCB11</i>                 | ACCGAGGTTGGAAGGTTGT     | CAGCCAACGACCCTGTGAAT    |
| <i>hABCC3</i>                  | CTGGTGGTTCACAAAGATGGC   | GGCATTTCCTCCAGGTGCTG    |
| <i>hABCG5</i>                  | GGGTGCTTGTTGGATCTGGA    | CATTGAGCTGCCACAAGTGA    |
| <i>hCYP7A1</i>                 | CTTCTGCGAAGGCATTTGGG    | GTCTGTCCCGCCTTGTAAGA    |
| <i>hCYP8B1</i>                 | GGGAGGTTCTTTGCACTCAG    | TAGTGGTGTGTCAGGGTC      |
| <i>hACAT2</i>                  | TATGAGCAAGGCTCCTCACTTG  | TCAAATGGCCAGCTTTCTGTG   |
| <i>hHMGCR</i>                  | GACGTGAACCTATGCTGGTCAG  | GGTATCTGTTTCAGCCACTAAGG |
| <i>hHMGCS1</i>                 | AAGTCACACAAGATGCTACACCG | TCAGCGAAGACATCTGGTGCCA  |
| <i>hLSS</i>                    | CGTGGTATATGCGCTCCTCA    | AGATCTGTGAGCCGTTGGTG    |
| <i>hOST<math>\alpha</math></i> | TGGAACCTGCCCTCACTAGC    | GGCAAAGGGTGTTCTTGTA     |
| <i>hOST<math>\beta</math></i>  | TGCTGGAAGAGATGCTTTGGT   | CTGCTTGCCTGGATGCTTCT    |
| <i>hSC4mol</i>                 | GCAAGATGCTTTGGTTGTGC    | AATGGTCACCCATGCCAAA     |
| <i>hSLC10A1</i>                | TGCGCTATGTCATCAAGGGAG   | GCCACATTGAGGATGGTGGA    |
| <i>hSLCO1B1</i>                | ACTGATTCTCGATGGGTTGG    | TATTTGGAGTTTGGGGCA      |

**Supplementary table S5: Used plasmids and positive controls for reporter gene assays.**

|                               | plasmid                                        | positive control                                                            |
|-------------------------------|------------------------------------------------|-----------------------------------------------------------------------------|
| <i>promoter assay</i>         |                                                |                                                                             |
| <i>CYP7A1</i>                 | pGL14- CYP7A1                                  | 5 $\mu$ M PMA (Sigma-Aldrich)                                               |
| <i>transactivation assays</i> |                                                |                                                                             |
| CAR                           | pGAL4/DBD-CAR/LBD(+3aa)<br>pGAL4-(UAS)5-TK-Luc | 10 $\mu$ M CITCO (Enzo life sciences)                                       |
| FXR                           | pGAL4-FXR-LBD<br>pGAL4-(UAS)5-TK-Luc           | 10 $\mu$ M GW4064 (Sigma-Aldrich)                                           |
| PXR                           | pGAL4-PXR-LBD<br>pGAL4-(UAS)5-TK-Luc           | 10 $\mu$ M SR12813 (Sigma-Aldrich)<br>10 $\mu$ M Rifampicin (Sigma-Aldrich) |
